# Supplementary material for: A handheld laser-cut device for the size-controlled assembly and electrical characterisation of lipid bilayers
Source: Royal Society of Chemistry journal article supplement (doi:10.1039/d4sd00076e), 2024-01-01
Supplement: d4sd00076e1.pdf [file d4sd00076e1.pdf]

## Electronic Supplementary Information

### A handheld laser-cut device for the size-controlled assembly and electrical characterisation of lipid bilayers

Ji Huang,<sup>a</sup> Yuval Elani,<sup>bc</sup> and Mark S. Friddin<sup>ac\*</sup>

<sup>a</sup> Dyson School of Design Engineering, Imperial College London, Exhibition Road, South Kensington, London. SW7 2AZ. Email: [m.friddin@imperial.ac.uk](mailto:m.friddin@imperial.ac.uk)

<sup>b</sup> Department of Chemical Engineering, Imperial College London, Exhibition Road, South Kensington, London. SW7 2AZ.

<sup>c</sup> fabriCELL, Imperial College London and Kings College London, London, UK

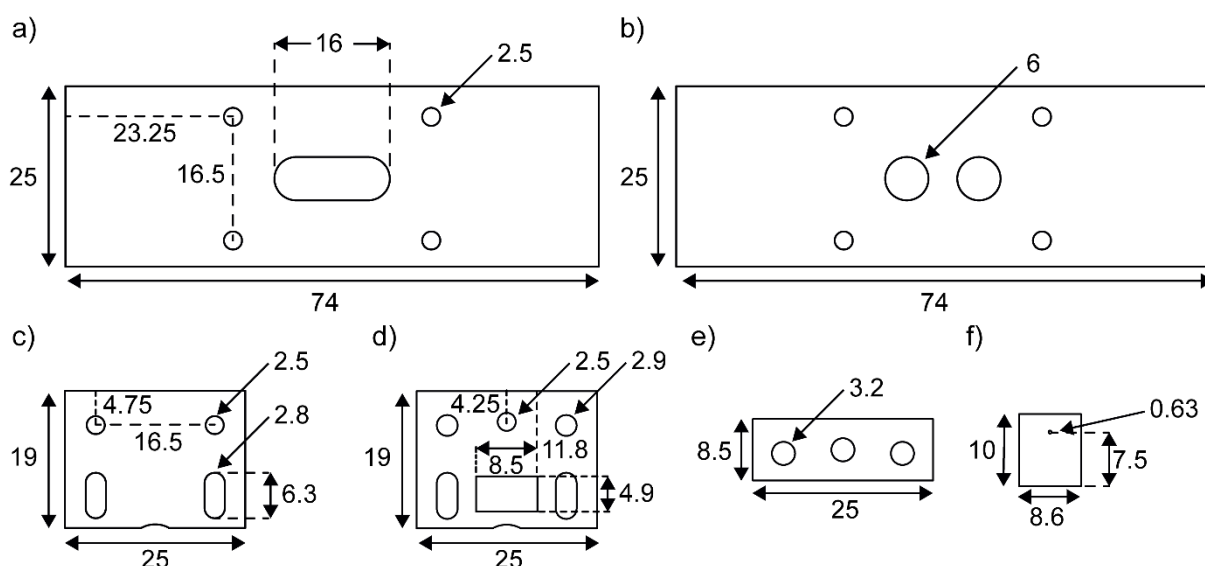

**Supplementary Fig 1. Technical drawings.** a) Single-channel bottom layer for containing the aqueous phase. b) Double well layer for separating the ground electrode. c) Tray for positioning the assembly in the X-axis. d) Tray for positioning the assembly in the Z-axis. e) Bracket for positioning screws for raising and lowering the electrode. f) Electrode holder. All dimensions are in mm and all parts were cut from 5 mm thick acrylic.

**Preparation of lipid-oil solution:** Lipid films were prepared by weighing DOPC in a glass vial, dissolving in chloroform and evaporating under a stream of  $N_2$ . The resulting lipid film was transferred to a desiccator for a minimum of 1h before being dissolved in hexadecane. To assist with fully dissolving the lipids, the glass vial was capped, wrapped in parafilm, and transferred to a sonicator where it was sonicated at full power for 20 minutes.

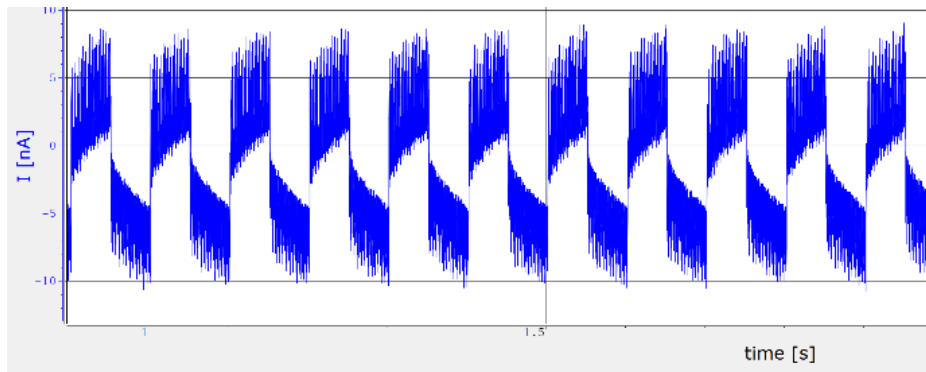

**Supplementary Fig 2. Bilayer capacitance of agar coated electrode.** Representative measurement of control experiments of Ag/AgCl electrodes manually dip coated in 5% agar solution (n=3). Agar coated electrodes yielded larger bilayers compared to naked Ag/AgCl electrodes.

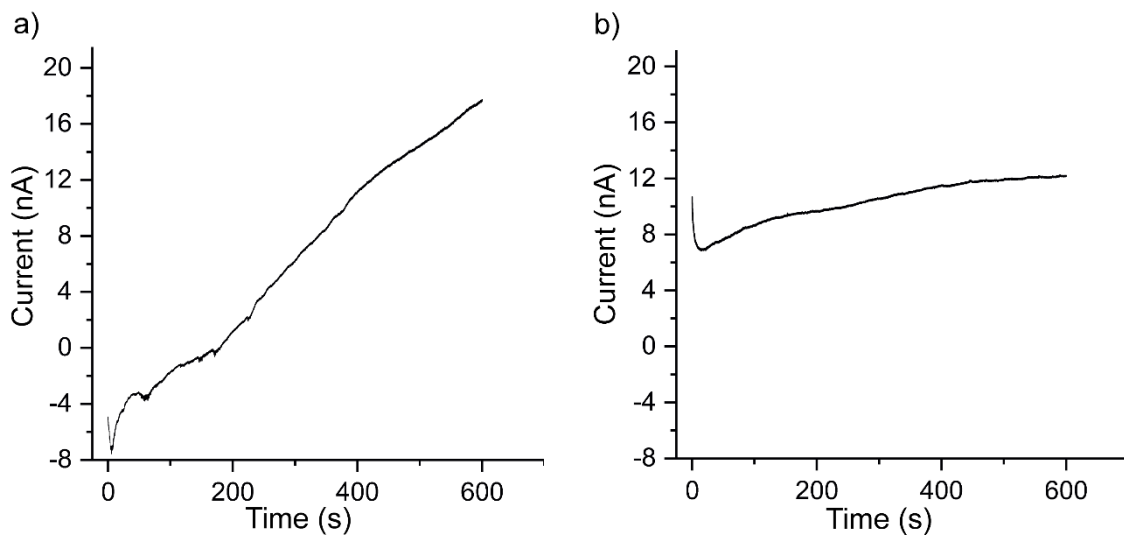

**Supplementary Fig 3. Bilayer functionalisation with nanopores.** a) - b) Repeat experiments as referred to in the main text. The traces show how the bilayer current increases in the presence of  $\alpha$ HL nanopores.

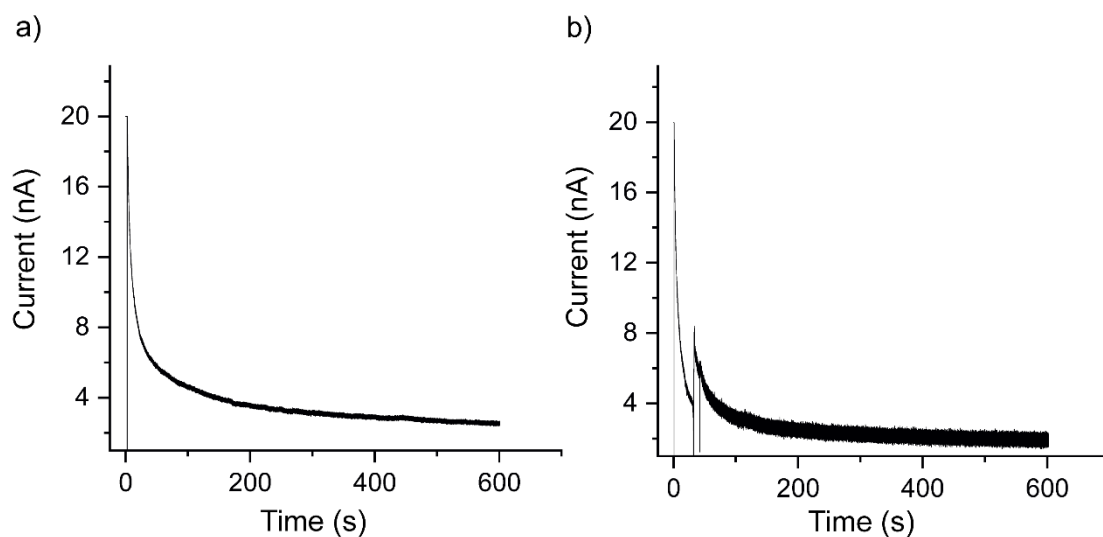

**Supplementary Fig 4. Bilayer current measurements in the presence of nanopores and the blocker TRIMEB.** a) - b) Repeat experiments as referred to in the main text. The traces show how the increase in bilayer current is reversed in the presence of TRIMEB and  $\alpha$ HL nanopores.

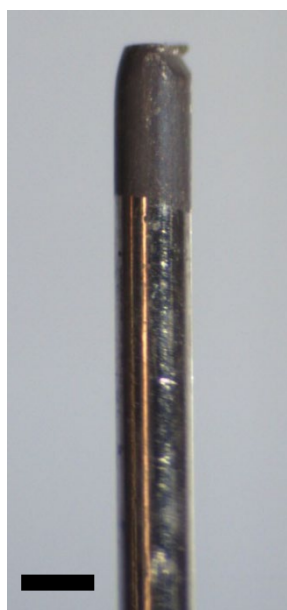

**Supplementary Fig 5. Micrograph of Ag/AgCl electrode.** The image shows a chamfer on the tip of the electrode which may have impacted the size of lipid bilayers formed. Scale bar = 500  $\mu$ m.
